# Supplementary material
Source: PubMed Central journal article supplement (PMC2151404)
Supplement: hesr0042-2109-ap1.pdf [file hesr0042-2109-ap1.pdf]

## Appendix A: Quality Measure Definitions

---

| Measure       | Definition                                                                                                                                                                                                                                                                                                                                                                                                                                                                                                                                                                                                                                                                                                                                                                                                                                                                                                                                                                                                            |
|---------------|-----------------------------------------------------------------------------------------------------------------------------------------------------------------------------------------------------------------------------------------------------------------------------------------------------------------------------------------------------------------------------------------------------------------------------------------------------------------------------------------------------------------------------------------------------------------------------------------------------------------------------------------------------------------------------------------------------------------------------------------------------------------------------------------------------------------------------------------------------------------------------------------------------------------------------------------------------------------------------------------------------------------------|
| Mortality     | Percent of patients within each admission type (see Appendix B) that died in the hospital. Excludes patients transferred to another short-term hospital; severity adjusted using the APR <sup>TM</sup> -DRG mortality score                                                                                                                                                                                                                                                                                                                                                                                                                                                                                                                                                                                                                                                                                                                                                                                           |
| Complications | Percent of patients within each admission type with any type of major complication, severity adjusted using the APR <sup>TM</sup> -DRG mortality score.<br><br>These include: <ul style="list-style-type: none"><li>• pulmonary compromise after major surgery*</li><li>• acute myocardial infarction after surgery</li><li>• gastrointestinal hemorrhage or ulceration after major surgery</li><li>• venous thrombosis or pulmonary embolism after major* surgery/invasive vascular procedure</li><li>• mechanical complications due to device, implant or graft</li><li>• urinary tract infection after major surgery</li><li>• pneumonia after major surgery*</li><li>• complications of anesthesia*</li><li>• postoperative hemorrhage or hematoma*</li><li>• postoperative hip fracture*</li><li>• postoperative physiologic embolism or deep vein thrombosis*</li><li>• postoperative wound dehiscence in abdominopelvic surgical patients*</li><li>• in hospital fractures possibly related to falls</li></ul> |

---

- 
- intraoperative nerve compression injuries
  - malignant hyperthermia
  - postoperative iatrogenic complications - cardiac system
  - postoperative iatrogenic complications - nervous system
  - reopening of a surgical site
  - suture of laceration\*
  - postoperative pneumonia
  - postoperative iatrogenic complications - digestive system
  - postoperative iatrogenic complications - respiratory system
  - postoperative iatrogenic complications - urinary system
  - postoperative iatrogenic complications - vascular system

---

|                   |                                                                                                                                            |
|-------------------|--------------------------------------------------------------------------------------------------------------------------------------------|
| Failure-to-rescue | Percent of patients with major complications that died in the hospital; severity adjusted using the APR <sup>TM</sup> -DRG mortality score |
|-------------------|--------------------------------------------------------------------------------------------------------------------------------------------|

---

|        |                                                                   |
|--------|-------------------------------------------------------------------|
| Volume | Number of patients discharged for specific procedure or diagnosis |
|--------|-------------------------------------------------------------------|

---

|      |                                                                                                                                                                                                                                                                                                                                                                                                  |
|------|--------------------------------------------------------------------------------------------------------------------------------------------------------------------------------------------------------------------------------------------------------------------------------------------------------------------------------------------------------------------------------------------------|
| CPOE | As reported on the Leapfrog hospital survey. Scored as: <ul style="list-style-type: none"> <li>4 fully implemented</li> <li>3 good progress (CPOE currently being implemented)</li> <li>2 good early stage effort (written strategy or currently implementing; budget approved)</li> <li>1 willing to report publicly (e.g, responded to the survey)</li> <li>0 no response to survey</li> </ul> |
|------|--------------------------------------------------------------------------------------------------------------------------------------------------------------------------------------------------------------------------------------------------------------------------------------------------------------------------------------------------------------------------------------------------|

---

|              |                                                                                                                                                      |
|--------------|------------------------------------------------------------------------------------------------------------------------------------------------------|
| ICU Staffing | As reported on the Leapfrog hospital survey. Scored as: <ul style="list-style-type: none"> <li>4 fully implemented (intensivists in ICUs)</li> </ul> |
|--------------|------------------------------------------------------------------------------------------------------------------------------------------------------|

---

---

3 good progress (intensivists available on-site or by telephone)

2 good early stage effort (written strategy or currently implementing;  
budget approved)

1 willing to report publicly (e.g, responded to the survey)

0 no response to survey

---

APR<sup>TM</sup>-DRG=All-Patient Refined Diagnosis Related Group; CPOE=Computerized Physician Order

Entry; ICU=Intensive Care Unit

\* Indicates a measure that corresponds to an AHRQ Patient Safety Indicator. Agency for Health Care Research and Quality. 2003. "AHRQ Quality Indicators - Guide to Patient Safety Indicators". Rockville, MD.
