# Supplementary material
Source: PubMed Central journal article supplement (PMC2151404)
Supplement: hesr0042-2109-ap2.pdf [file hesr0042-2109-ap2.pdf]

**Appendix B: Admission Types Included in Analyses**

| <b>Name</b>                           | <b>Billing codes</b>                                               |
|---------------------------------------|--------------------------------------------------------------------|
| Angioplasty                           | PP 36.01, 36.02, 36.05 in DRG 112, 116, 516, 517,<br>518, 526, 527 |
| Coronary artery bypass grafting       | DRG 106, 107, 109                                                  |
| Cardiac catheterization               | DRG 124, 125                                                       |
| Myocardial infarction                 | DRG 121, 122, 123                                                  |
| Congestive heart failure              | DRG 127                                                            |
| Heart valve replacement               | DRG 104, 105 x PP 3794                                             |
| Irregular heartbeat                   | DRG 138, 139                                                       |
| Total abdominal hysterectomy          | PP 68.4 in DRG 358, 359                                            |
| Colon surgery                         | PP 45.73, 45.74, 45.75, 45.76 in DRG 148, 149                      |
| Gall bladder removal                  | PP 51.22 in DRG 195, 196, 197, 198                                 |
| Prostatectomy, radical                | PP 60.5 in DRG 306, 307, 334, 335                                  |
| Prostatectomy, transurethral          | PP 60.2x in DRG 306, 307, 336, 337                                 |
| Urinary tract infection               | PD 599.0 in DRG 320, 321                                           |
| Total mastectomy                      | DRG 257, 258                                                       |
| Craniotomy                            | DRG 001, 002                                                       |
| Stroke                                | DRG 014                                                            |
| Chronic obstructive pulmonary disease | DRG 088                                                            |
| Pneumonia                             | DRG 089, 090                                                       |
| Disc surgery                          | PP 80.51 in DRG 499, 500                                           |
| Hip replacement, total                | PP81.51 in DRG 209                                                 |

---

|                         |                     |
|-------------------------|---------------------|
| Knee replacement, total | PP 81.54 in DRG 209 |
|-------------------------|---------------------|

---

|               |                        |
|---------------|------------------------|
| Spinal fusion | DRG 497, 498, 519, 520 |
|---------------|------------------------|

---

PP=Principal Procedure; DRG=Diagnosis Related Group (as defined by the Centers for Medicare and Medicaid Services); PD=Principal Diagnosis

Procedure and diagnosis codes are International Classification of Disease, 9<sup>th</sup> edition
